# Supplementary material for: Microbial Diversity Based on Multifractal Analysis of Metagenomes
Source: Preprints.org preprint supplement (doi:10.20944/preprints202107.0560.v1), 2021-07-26
Supplement: Supplementary file 2 [file TableS1.xls]

## Sheet: Sheet1
	Alistipes_shahii_WAL_8301	Bacteroides_vulgatus_ATCC_8482	Bifidobacterium_adolescentis_ATCC_15703	Faecalibacterium_prausnitzii_L2_6	Lachnospiraceae_bacterium_1_4_56FAA	Coprococcus_sp_ART55_1	Eubacterium_eligens_ATCC_27750	Prevotella_copri_DSM_18205	Akkermansia_muciniphila_ATCC_BAA_835	Ruminococcus_sp_18P13
1	0.0345051	0.562966	0	0	0.154026	0.00172212	0.116987	0	0.0874565	0.0423374
2	0.163713	0.304848	0.221387	0.0185794	0.0995125	0	0.123825	0	0.0681349	0
3	0.0573575	0.493331	0	0.12607	0.151468	0.0401042	0.0180694	0.0180747	0	0.0955255
4	0.0811587	0.741508	0	0.0707931	0	0	0	0	0.0608256	0.0457146
5	0.104116	0.539627	0.0768969	0.0728055	0.00427018	0.0758267	0.102759	0	0.0171869	0.00651193
6	0.0630952	0.695726	0	0.0872345	0.0995738	0.0226266	0.0143201	0	0.017424	0
7	0.0688806	0.452435	0	0.111561	0.0609361	0	0	0.21383	0.0407749	0.0515828
8	0.128236	0.228313	0.0207583	0.0386415	0.0717765	0.0773376	0	0.418898	0	0.0160393
9	0.00822275	0.693808	0	0.086453	0.0427266	0.00743548	0.0616606	0	0.0592502	0.0404438
10	0	0.570048	0	0.0688324	0.0475838	0.0685194	0.0107382	0.230036	0	0.0042419
11	0	0.524305	0.114852	0	0	0	0.0889846	0.228342	0	0.0435168
12	0.0234726	0.415345	0.0831667	0.049154	0.0659684	1.91967e-06	0	0.258891	0.0547358	0.0492646
13	0.139542	0.282393	0.0716854	0.0269955	0.0796712	0.00914848	0.0606956	0	0	0.329869
14	0.00859667	0.553318	0.0901639	0.0913983	0.0059629	0.0191246	0	0.135875	0.0745331	0.0210276
15	0.00940685	0.612284	0	0.000702477	0.0521764	0.0519689	0.0171702	0.182708	0	0.0735831
16	0	0.161302	0.2219	0.158969	0.0603362	0.0705274	0.0469325	0.141825	0.0557864	0.0824215
17	0.02218	0.0516023	0	0.110705	0.172865	0.0154631	0.00145138	0.460049	0.141179	0.0245039
18	0.030901	0.504526	0	0.174085	0.16638	0.00963505	0	0.048514	0.0302598	0.0356993
19	0.0427365	0.340593	0	0	0.103946	0	0.080895	0.280848	0.0904404	0.0605401
20	0.0497165	0.441696	0.0209113	0	0.0462685	0.076721	0.0225635	0.30505	0	0.0370738
21	0	0.276385	0	0	0.150331	0.141974	0.0766961	0.194882	0.0874347	0.0722966
22	0.0094752	0.483988	0	0.127701	0.207273	0.0777397	0	0.011506	0.0378519	0.0444654
23	0.0742329	0.275249	0.0995273	0.158097	0.0793863	0.0384298	0	0.202969	0.0508273	0.021281
24	0	0.40631	0	0.0850587	0.0549454	0.0164011	0.0407665	0.353496	0.0111377	0.0318846
25	0	0.791142	0.02281	0.00822547	0	0.0446599	0.029355	0.0476772	0.0561304	0
26	0.123421	0.454834	0	0	0.0624545	0	0.0582219	0.22307	0.0542103	0.0237887
27	0	0.522301	0	0	0.377942	0	0.0997577	0	0	0
28	0.12832	0.435323	0.210847	0.00154672	0.0719826	0.109708	0	0	0.0422732	0
29	0.0456698	0.405405	0.040371	0.134784	0.139221	0.0927817	0	0	0.0412133	0.100554
30	0.0256922	0.789509	0	0.089444	0.00452969	0.018049	0.0286859	0	0	0.0440905
31	0.00877748	0.526018	0.0600231	0	0.0695102	0.0339047	0	0.0985139	0.0697706	0.133482
32	0.0257202	0.688021	0	0.132289	0.0359083	0	0.0866229	0.0314395	0	0
33	0.059511	0.305797	0	0.0658407	0.0563351	0.114032	0.0689912	0.28373	0	0.0457632
34	0.0589684	0.555088	0	0	0.12675	0.0034025	0.118498	0.0228568	0	0.114436
35	0.118871	0.251612	0.346052	0.0843155	0.0841286	0	0.0371802	0	0.0778401	0
36	0.0624792	0.490437	0	0.0932588	0.136097	0.10228	0	0.0343944	0.0150205	0.066033
37	0.0489889	0.547174	0.0341568	0.0385979	0.00713881	0.0663555	0	0.226382	0.0111195	0.0200865
38	0.148127	0.14777	0	0.00785202	0.147241	0.148053	0	0.281096	0.0630366	0.0568244
39	0.044069	0.339034	0.0767221	0.0328337	0.0668506	0.0539869	0.0618575	0.233733	0.0308165	0.060096
40	0	0.602057	0.047282	0.0144513	0.141321	0.04116	0	0	0.0682716	0.0854574
41	0.0649929	0.475219	0.0243859	0.0194076	0.0827777	0.0316955	0.0653436	0.0805706	0.0722718	0.0833358
42	0	0.402771	0	0.0838923	0	0.119095	0.0974173	0.296824	0	0
43	0.124926	0	0	0.139337	0.195719	0	0.175386	0.103134	0.0876394	0.173858
44	0.00672545	0.483993	0.0321466	0.0507963	0.0723324	0	0.0582922	0.248026	0.0241847	0.0235031
45	0	0.418803	0	0	0.0673359	0	0.127835	0.2368	0.0544303	0.0947958
46	0	0.606155	0	0.132996	0.145815	0.0204488	0	0	0.0159679	0.0786169
47	0	0	0.0800604	0.141287	0.146264	0.101336	0.264465	0	0.199751	0.0668357
48	0.0623068	0.350627	0.0143605	0.0599405	0.122006	0.0831639	0.0121239	0.254749	0	0.0407222
49	0.0180246	0.591089	0	0.00289884	0	0.0649496	0.0565675	0.258658	0	0.00781214
50	0.0621062	0.447339	0	0	0.102841	0.0321188	0	0.299969	0.00284056	0.0527856
51	0.0304688	0.705825	0.0326486	0	0.0824547	0.000588385	0.0638713	0	0.0201414	0.0640015
52	0	0.704714	0.197711	0	0	0.0498629	0	0	0.0258688	0.021843
53	0.11006	0.350128	0.0079212	0.0230968	0.00995059	0.0184293	0.0508804	0.367217	0.0568962	0.00541995
54	0.119011	0.562175	0	0.085018	0.0325557	0	0.0723731	0.0548644	0.0612639	0.0127394
55	0.0146247	0.528679	0	0.149611	0.0991194	0.0594038	0.0576588	0	0.0909032	0
56	0.0792079	0.422225	0.0274469	0.0214837	0.0815741	0	0.0322943	0.279188	0.0369426	0.0196375
57	0.0455701	0.169404	0.0628989	0.0564436	0.0607039	0.0530321	0.0683038	0.441905	0.00798688	0.0337524
58	0.0575479	0.288596	0.161032	0.124302	0.00259464	0	0	0.217023	0.0432141	0.105691
59	0	0.545341	0.0491392	0.129096	0.121954	0.00346011	0.0581438	0.0767174	0	0.0161488
60	0.067701	0.48267	0	0.0960063	0.1406	0.0204072	0.0347929	0.146964	0.0108588	0
61	0.0110172	0.392788	0.0951271	0.0601565	0.0870245	0.0385831	0.0328958	0.157343	0.0111575	0.113907
62	0.0693743	0.436937	0.0678358	0.0529091	0.0351717	0.00726395	0	0.245506	0.0536495	0.0313527
63	0.0837455	0.551415	0.0402305	0.0756543	0.0134814	0.0862881	0.00407154	0.0198559	0.0648445	0.0604133
64	0	0.465232	0.176802	0	0	0.0796878	0	0	0.157774	0.120505
65	0.012112	0.533529	0.0144058	0.129086	0.17609	0	0	0	0	0.134777
66	0.114535	0.267116	0.144712	0.100164	0	0.0335997	0.0195951	0.188531	0	0.131747
67	0.0743926	0.557757	0.164271	0.0289463	0.084494	0.0303389	0.0217353	0	0.00930407	0.0287601
68	0.0293921	0.424863	0.101739	0.0727418	0.133465	0.0736928	0.0788819	0.0852238	0	0
69	0.0124729	0.445568	0.164555	0.135343	0.00385823	0.0937567	0.0546797	0.0574896	0.0102938	0.0219824
70	0.0567943	0.440614	0.0266046	0.062676	0.11765	0.00625627	0.101241	0	0.0467049	0.141459
71	0.0668787	0.541592	0.110295	0	0.0900025	0.0829621	0.012038	0	0.0599393	0.0362931
72	0	0.568347	0.0852944	0.207971	0	0	0	0	0	0.138387
73	0.0566426	0.685327	0	0	0.0793837	0.0755841	0.00428167	0.0336311	0.0527966	0.0123536
74	0	0.504499	0.0442531	0.131144	0.0950716	0.0497987	0.00925411	0	0.0752374	0.0907418
75	0.0515634	0.528702	0.118304	0.0707974	0.0260301	0	0.0146891	0.0969023	0.0424547	0.050557
76	0	0.536395	0.0608648	0.100875	0.00344011	0.0623062	0	0.236119	0	0
77	0.0749497	0.411336	0.0680565	0.000217014	0.0840173	0.0655706	0.0375141	0.17206	0	0.0862786
78	0.0581317	0.375277	0.0745805	0.0917651	0.0381884	0.0665919	0.00878171	0.157341	0.0513795	0.0779629
79	0.138347	0.484989	0	0.123684	0.0191777	0	0.131514	0	0.0421048	0.0601829
80	0.040576	0	0	0.0284069	0.177833	0.516467	0.11967	0	0.117047	0
81	0.0705136	0.438648	0.167501	0.0452128	0.118109	0	0.013745	0.0857652	0.0274115	0.0330941
82	0	0.540093	0.0776339	0.136848	0.106352	0.0967359	0.0144874	0	0	0.0278495
83	0	0.256969	0.147543	0.065703	0.116449	0.0773384	0.00296101	0.26079	0.031841	0.0404056
84	0	0.698203	0	0.0608275	0.00599074	0.0296388	0.0351002	0.121761	0	0.0484785
85	0	0.279612	0.0537035	0	0.0981569	0.0283012	0	0.39116	0.0355001	0.113566
86	0.0544951	0.409817	0.0418968	0.100133	0.00701641	0.0481456	0.0670681	0.243906	0.0275222	0
87	0.054232	0.643399	0	0.0653567	0.139163	0	0.0508569	0.0343019	0.00112554	0.0115653
88	0.035342	0.502884	0.0723234	0.087623	0.0349196	0.00343578	0.0581133	0.10737	0.0562691	0.0417191
89	0.0547598	0.543155	0.0277113	0.0983568	0.108965	0	0.0522666	0	0.0812718	0.0335137
90	0.00972471	0.635352	0.0398738	0.0915552	0.0206046	0.0498492	0.0193532	0.0768008	0	0.0568861
91	0.0489021	0.0604544	0	0.0644219	0.0989936	0.0913399	0.00244335	0.292178	0.211044	0.130222
92	0.0778355	0.641358	0.0753966	0.0254277	0.0346624	0.0350982	0	0	0.0278218	0.0824001
93	0	0.527621	0	0.137518	0.111268	0	0	0.161382	0.0622115	0
94	0.1088	0.491524	0.0869243	0.178035	0.0266581	0.06465	0.0168048	0	0.0266041	0
95	0.0490668	0.520162	0.0089585	0.120543	0.131803	0.0500071	0.0614039	0.0194969	0.0385583	0
96	0	0.737179	0.0173432	0.0197198	0.0561796	0.0452322	0.030281	0	0.02439	0.0696756
97	0	0.6036	0.0578306	0.0696425	0	0	0.00745348	0.216539	0.0166917	0.0282428
98	0	0.436933	0	0.0906168	0.0389703	0.058101	0.0224981	0.312643	0.0377962	0.00244179
99	0.119601	0.302108	0	0.0745475	0	0.0297034	0.0974564	0.258647	0.00874396	0.109192
100	0.0169288	0.305595	0.120814	0	0.0795999	0.00894306	0.0368263	0.377688	0.00570905	0.0478963
